# Supplementary material for: Vibrational properties of metastable orthorhombic Bi2Se3
Source: Royal Society of Chemistry journal article supplement (doi:10.1039/d2cp04945g), 2023-01-01
Supplement: d2cp04945g1.pdf [file d2cp04945g1.pdf]

# Vibrational Properties of Metastable

## Orthorhombic $\text{Bi}_2\text{Se}_3$

Paloma B. Souza<sup>a</sup>, Milton A. Tumelero<sup>b\*</sup>, Ricardo Faccio<sup>c</sup>, Rasin Ahmed<sup>d</sup>, Cristiani C.

Plá Cid<sup>a</sup>, Giovanni Zangari<sup>e</sup>, & Andre A. Pasa<sup>a</sup>

a. Departamento de Física, Universidade Federal de Santa Catarina, 88.040-900  
Florianópolis, Brazil.

b. Instituto de Física, Universidade Federal do Rio Grande do Sul, Caixa Postal  
15051, 91501-970 Porto Alegre, Brazil..

c. Centro NanoMat & Área Física, DETEMA, Facultad de Química, Universidad  
de la República (Udelar), Montevideo C.P. 11800, Uruguay.

d. Department of Electrical Engineering, University of Virginia, Charlottesville,  
Virginia 22904, USA.

e. Department of Materials Science and Engineering, University of Virginia,  
Charlottesville, Virginia 22904, USA.

## SUPPLEMENTARY MATERIAL

The table S1 presents the atomic positions of the Bi<sub>2</sub>Se<sub>3</sub> in the unitary cells used for the calculations.

Table S1: Unitary cell for Bi<sub>2</sub>Se<sub>3</sub> Phases

| Pnma |        |        |        | R-3m |        |        |        |
|------|--------|--------|--------|------|--------|--------|--------|
| Atom | X      | y      | z      | Atom | x      | y      | z      |
| Bi   | 0.5007 | 0.2500 | 0.1721 | Bi   | 0      | 0      | 0      |
| Bi   | 0.4993 | 0.7500 | 0.8279 | Bi   | 0      | 0      | 0.5990 |
| Bi   | 0.9993 | 0.7500 | 0.6721 | Bi   | 0.6667 | 0.3333 | 0.7443 |
| Bi   | 0.0007 | 0.2500 | 0.3279 | Bi   | 0.6667 | 0.3333 | 0.9323 |
| Bi   | 0.6641 | 0.7500 | 0.4631 | Bi   | 0.3333 | 0.6667 | 0.0677 |
| Bi   | 0.3359 | 0.2500 | 0.5369 | Bi   | 0.3333 | 0.6667 | 0.2567 |
| Bi   | 0.8358 | 0.2500 | 0.9631 | Bi   | 0      | 0      | 0.4010 |
| Bi   | 0.1641 | 0.7500 | 0.0369 | Se   | 0      | 0      | 0.5990 |
| Se   | 0.6265 | 0.7500 | 0.0557 | Se   | 0.6667 | 0.3333 | 0.3333 |
| Se   | 0.3734 | 0.2500 | 0.9442 | Se   | 0.6667 | 0.3333 | 0.5433 |
| Se   | 0.8734 | 0.2500 | 0.5558 | Se   | 0.3333 | 0.6667 | 0.6667 |
| Se   | 0.1266 | 0.7500 | 0.4442 | Se   | 0.3333 | 0.6667 | 0.8766 |
| Se   | 0.7213 | 0.2500 | 0.2981 | Se   | 0      | 0      | 0.7900 |
| Se   | 0.2786 | 0.7500 | 0.7019 | Se   | 0.6667 | 0.3333 | 0.1234 |
| Se   | 0.7786 | 0.7500 | 0.7981 | Se   | 0.3333 | 0.6667 | 0.8766 |
| Se   | 0.2213 | 0.2500 | 0.2019 | Se   | 0.3333 | 0.6667 | 0.4567 |
| Se   | 0.4445 | 0.7500 | 0.3672 |      |        |        |        |
| Se   | 0.5554 | 0.2500 | 0.6328 |      |        |        |        |
| Se   | 0.0554 | 0.2500 | 0.8672 |      |        |        |        |
| Se   | 0.9445 | 0.7500 | 0.1328 |      |        |        |        |

In the table below are presented all Raman Modes obtained in the DFT calculation for the both phases, the R-3m and the Pnma. The lines highlighted in yellow are the most active modes.

Table S2: Raman Modes, Symmetry and Activities from DFT calculation.

| Rhombohedral Phase (R-3M) |                 |                              |          | Orthorhombic Phase (Pnma) |                 |                              |          |
|---------------------------|-----------------|------------------------------|----------|---------------------------|-----------------|------------------------------|----------|
| Mode                      | Symmetry        | Frequency(cm <sup>-1</sup> ) | Activity | Mode                      | Symmetry        | Frequency(cm <sup>-1</sup> ) | Activity |
| 5                         | A <sub>1g</sub> | 180.8445                     | 146115   | 1                         | B <sub>1u</sub> | 182.943                      | 0.0590   |
| 6                         | A <sub>2u</sub> | 170.0389                     | 0.0055   | 2                         | B <sub>3u</sub> | 178.6646                     | 0.0003   |
| 9                         | A <sub>2u</sub> | 145.3084                     | 0.4724   | 3                         | B <sub>2g</sub> | 174.6488                     | 2963.1   |
| 10                        | E <sub>g</sub>  | 141.7409                     | 75965    | 4                         | A <sub>g</sub>  | 172.938                      | 11166.   |

|    |                 |          |        |    |                 |          |        |
|----|-----------------|----------|--------|----|-----------------|----------|--------|
| 16 | E <sub>u</sub>  | 134.5128 | 3.9732 | 5  | B <sub>3u</sub> | 170.2593 | 0.0084 |
| 26 | E <sub>u</sub>  | 88.9838  | 4.0431 | 6  | B <sub>2g</sub> | 168.9988 | 4194.0 |
| 28 | A <sub>1g</sub> | 76.79783 | 19341. | 7  | B <sub>1u</sub> | 164.6217 | 0.0010 |
| 31 | E <sub>g</sub>  | 43.91538 | 195.63 | 8  | A <sub>g</sub>  | 163.1819 | 3564.3 |
|    |                 |          |        | 9  | B <sub>1u</sub> | 158.639  | 0.0032 |
|    |                 |          |        | 10 | A <sub>g</sub>  | 156.6652 | 116478 |
|    |                 |          |        | 11 | B <sub>2g</sub> | 155.2874 | 3254.8 |
|    |                 |          |        | 12 | B <sub>3u</sub> | 149.8731 | 0.0367 |
|    |                 |          |        | 13 | B <sub>2g</sub> | 144.3683 | 5260.0 |
|    |                 |          |        | 14 | B <sub>3g</sub> | 137.3832 | 291.59 |
|    |                 |          |        | 15 | B <sub>1g</sub> | 135.6143 | 2137.4 |
|    |                 |          |        | 16 | B <sub>1u</sub> | 134.0706 | 3.5523 |
|    |                 |          |        | 17 | B <sub>3u</sub> | 132.861  | 0.0006 |
|    |                 |          |        | 18 | B <sub>2g</sub> | 132.2939 | 185.61 |
|    |                 |          |        | 19 | B <sub>2u</sub> | 131.5038 | 0.0208 |
|    |                 |          |        | 20 | A <sub>g</sub>  | 130.7787 | 8137.8 |
|    |                 |          |        | 21 | A <sub>u</sub>  | 129.6016 | 0.0091 |
|    |                 |          |        | 22 | B <sub>1g</sub> | 128.7876 | 128.19 |
|    |                 |          |        | 23 | B <sub>2u</sub> | 128.309  | 3.3394 |
|    |                 |          |        | 24 | A <sub>g</sub>  | 127.0941 | 4973.6 |
|    |                 |          |        | 25 | A <sub>u</sub>  | 126.3647 | 0.0058 |
|    |                 |          |        | 26 | B <sub>3g</sub> | 125.6311 | 11741. |
|    |                 |          |        | 27 | B <sub>1u</sub> | 123.2143 | 0.0968 |
|    |                 |          |        | 28 | B <sub>2g</sub> | 122.9879 | 79.298 |
|    |                 |          |        | 29 | A <sub>g</sub>  | 121.7258 | 10486. |
|    |                 |          |        | 30 | B <sub>3u</sub> | 121.4234 | 0.0040 |
|    |                 |          |        | 31 | B <sub>3g</sub> | 113.6492 | 404.07 |
|    |                 |          |        | 32 | B <sub>1g</sub> | 109.1341 | 104.93 |
|    |                 |          |        | 33 | B <sub>3u</sub> | 99.51381 | 2.9858 |
|    |                 |          |        | 34 | A <sub>u</sub>  | 95.43844 | 0.0004 |
|    |                 |          |        | 35 | A <sub>g</sub>  | 88.33544 | 1455.7 |
|    |                 |          |        | 36 | B <sub>2u</sub> | 87.67187 | 0.0294 |
|    |                 |          |        | 37 | B <sub>1u</sub> | 86.33217 | 0.0003 |
|    |                 |          |        | 38 | B <sub>2g</sub> | 86.04035 | 724.48 |
|    |                 |          |        | 39 | B <sub>1u</sub> | 74.07029 | 0.0322 |
|    |                 |          |        | 40 | B <sub>2g</sub> | 72.50459 | 1082.6 |
|    |                 |          |        | 41 | B <sub>3u</sub> | 71.65241 | 0.0005 |
|    |                 |          |        | 42 | B <sub>2g</sub> | 69.39349 | 228.13 |
|    |                 |          |        | 43 | A <sub>g</sub>  | 58.85512 | 469.01 |
|    |                 |          |        | 44 | B <sub>1u</sub> | 58.64523 | 0.0078 |
|    |                 |          |        | 45 | B <sub>3u</sub> | 53.84063 | 0.0008 |
|    |                 |          |        | 46 | B <sub>3g</sub> | 50.91584 | 1034.5 |
|    |                 |          |        | 47 | B <sub>1g</sub> | 50.71975 | 175.21 |
|    |                 |          |        | 48 | B <sub>2u</sub> | 48.75048 | 2.1070 |
|    |                 |          |        | 49 | A <sub>u</sub>  | 45.30886 | 0.0002 |
|    |                 |          |        | 50 | A <sub>g</sub>  | 43.39543 | 2366.1 |
|    |                 |          |        | 51 | B <sub>1u</sub> | 39.76913 | 0.1143 |
|    |                 |          |        | 52 | B <sub>3g</sub> | 39.30506 | 1498.5 |
|    |                 |          |        | 53 | A <sub>g</sub>  | 35.4169  | 521.36 |
|    |                 |          |        | 54 | B <sub>1g</sub> | 35.37753 | 0.9160 |
|    |                 |          |        | 55 | B <sub>2g</sub> | 32.79967 | 314.12 |
|    |                 |          |        | 56 | B <sub>3u</sub> | 24.58311 | 0.0259 |
|    |                 |          |        | 57 | A <sub>u</sub>  | 21.15165 | 0.0010 |

INCAR (VASP FILE) used in the SCF Pnma Bi<sub>2</sub>Se<sub>3</sub> calculations.

SYSTEM = Bi<sub>2</sub>Se<sub>3</sub>

NWRITE = 3

LPLANE = .TRUE.

LSCALU = .FALSE.

NSIM = 1

NCORE = 4

ISTART = 1

ICHARG = 1

ALGO = VeryFast

PREC = Accurate

LREAL = AUTO

IBRION = 2

ISIF = 3

NSW = 200

EDIFFG = -0.01

ISMEAR = 1

SIGMA = 0.1

NWRITE = 3

LREAL = .FALSE.

IALGO = 38

ADDGRID = .TRUE.

INCAR (VASP FILE) used in the SCF R-3m Bi<sub>2</sub>Se<sub>3</sub> calculations.

SYSTEM = Bi<sub>2</sub>Se<sub>3</sub>

NWRITE = 3

LPLANE = .TRUE.

LSCALU = .FALSE.

NSIM = 1

NCORE = 4

ISTART = 1

ICHARG = 1

ALGO = VeryFast

PREC = Accurate

LREAL = AUTO

IBRION = 2

ISIF = 3

NSW = 200

EDIFFG = -0.01

ISMEAR = 1

SIGMA = 0.1

NWRITE = 3

LREAL = .FALSE.

IALGO = 38

ADDGRID = .TRUE.
